# Supplementary material for: In Vivo and In Vitro Evaluation of Pharmacological Potentials of Secondary Bioactive Metabolites of Dalbergia candenatensis Leaves
Source: Hindawi journal article supplement (doi:10.1155/2017/5034827), 2017-01-01
Supplement: f1 [file 5034827.f1.pdf]

# Supplementary file for manuscript 5034827 titled "Evaluation of secondary bioactive metabolites pharmacological potentials from *Dalbergia candenatensis* leaves"

Figure - 2 Supplementary raw data of acetic acid induced writhing (Analgesic activity) test in mice

## Vincristin sulphate (LC<sub>50</sub>)

| Con. ( ) | Responded | Non responded | Total | Response % |
|----------|-----------|---------------|-------|------------|
| T 0.3125 | 4         | 6             | 10    | 40.000     |
| T 0.625  | 5         | 5             | 10    | 50.000     |
| T 1.25   | 6         | 4             | 10    | 60.000     |
| T 2.5    | 6.5       | 3.5           | 10    | 65.000     |
| T 5      | 8         | 2             | 10    | 80.000     |

  

| Con. ( ) | Total | Response % | Corrected Response % |
|----------|-------|------------|----------------------|
| 0.3125   | 10    | 40.000     | 40.000               |
| 0.625    | 10    | 50.000     | 50.000               |
| 1.25     | 10    | 60.000     | 60.000               |
| 2.5      | 10    | 65.000     | 65.000               |
| 5        | 10    | 80.000     | 80.000               |

## Dalbergia candenatensis (LC<sub>50</sub>)

| Con. ( ) | Responded | Non responded | Total | Response % |
|----------|-----------|---------------|-------|------------|
| T 1      | 0.5       | 9.5           | 10    | 5.000      |
| T 2      | 0.5       | 9.5           | 10    | 5.000      |
| T 4      | 1         | 9             | 10    | 10.000     |
| T 8      | 1.5       | 9.5           | 11    | 13.636     |
| T 16     | 2         | 8             | 10    | 20.000     |
| T 32     | 2.5       | 7.5           | 10    | 25.000     |
| T 64     | 3.5       | 6.5           | 10    | 35.000     |
| T 128    | 4.5       | 5.5           | 10    | 45.000     |
| T 256    | 5.5       | 4.5           | 10    | 55.000     |
| T 512    | 7.5       | 2.5           | 10    | 75.000     |

  

| Con. ( ) | Total | Response % | Corrected Response % |
|----------|-------|------------|----------------------|
| 1        | 10    | 5.000      | 5.000                |
| 2        | 10    | 5.000      | 5.000                |
| 4        | 10    | 10.000     | 10.000               |
| 8        | 11    | 13.636     | 13.636               |
| 16       | 10    | 20.000     | 20.000               |
| 32       | 10    | 25.000     | 25.000               |
| 64       | 10    | 35.000     | 35.000               |
| 128      | 10    | 45.000     | 45.000               |
| 256      | 10    | 55.000     | 55.000               |
| 512      | 10    | 75.000     | 75.000               |

**Table- 3 Supplementary raw data of acetic acid induced writhing (Analgesic activity) test in mice**

| S.L. No. | Animal Groups                             | Dose         | Weight of mice (g) | No. of writhing | Mean writhing | % writhing | % inhibition of writhing |
|----------|-------------------------------------------|--------------|--------------------|-----------------|---------------|------------|--------------------------|
| 1        | Control<br>(Tween-80<br>water -1%<br>w/v) | 10<br>ml/kg  | 21                 | 21              | 19.60±1.81    | 100        | 0                        |
|          |                                           |              | 26                 | 18              |               |            |                          |
|          |                                           |              | 23                 | 17              |               |            |                          |
|          |                                           |              | 24                 | 26              |               |            |                          |
|          |                                           |              | 27                 | 16              |               |            |                          |
| 2        | Diclofenac<br>sodium                      | 25<br>mg/kg  | 26                 | 3               | 4.60±0.68*    | 23.47      | 76.53                    |
|          |                                           |              | 29                 | 5               |               |            |                          |
|          |                                           |              | 30                 | 4               |               |            |                          |
|          |                                           |              | 27                 | 7               |               |            |                          |
|          |                                           |              | 25                 | 4               |               |            |                          |
| 3        | Extract I                                 | 100<br>mg/kg | 24                 | 14              | 15.00±0.71*   | 76.53      | 23.47                    |
|          |                                           |              | 28                 | 13              |               |            |                          |
|          |                                           |              | 27                 | 17              |               |            |                          |
|          |                                           |              | 21                 | 16              |               |            |                          |
|          |                                           |              | 22                 | 15              |               |            |                          |
| 4        | Extract II                                | 250<br>mg/kg | 23                 | 10              | 11.60±1.08*   | 59.18      | 40.82                    |
|          |                                           |              | 24                 | 15              |               |            |                          |
|          |                                           |              | 24                 | 13              |               |            |                          |
|          |                                           |              | 21                 | 11              |               |            |                          |
|          |                                           |              | 29                 | 09              |               |            |                          |
| 5        | Extract III                               | 500<br>mg/kg | 27                 | 13              | 8.4±1.33*     | 42.86      | 57.14                    |
|          |                                           |              | 24                 | 08              |               |            |                          |
|          |                                           |              | 29                 | 07              |               |            |                          |
|          |                                           |              | 24                 | 05              |               |            |                          |
|          |                                           |              | 26                 | 09              |               |            |                          |

Data was presented as mean ± SEM, SEM= Standard Error Mean, Here, \* indicates p<0.05.

**Table – 4 Supplementary raw data of anti-inflammatory activity test**

| Groups                          | Dose (mg/kg) | Difference in paw diameter |      |      |      |       |       |
|---------------------------------|--------------|----------------------------|------|------|------|-------|-------|
|                                 |              | 1 hr                       | 2 hr | 3 hr | 4 hr | 24 hr | 48 hr |
| Control (1% v/v Tween-80 water) | 10 ml/kg     | 1.10                       | 1.24 | 1.29 | 1.31 | 1.28  | 1.25  |
|                                 |              | 1.11                       | 1.24 | 1.28 | 1.36 | 1.33  | 1.27  |
|                                 |              | 1.09                       | 1.26 | 1.27 | 1.32 | 1.32  | 1.25  |
|                                 |              | 1.12                       | 1.27 | 1.28 | 1.34 | 1.29  | 1.24  |
|                                 |              | 1.08                       | 1.25 | 1.27 | 1.30 | 1.28  | 1.30  |
| Indomethacin                    | 10 mg/kg     | 0.81                       | 0.84 | 0.47 | 0.51 | 0.60  | 0.62  |
|                                 |              | 0.82                       | 0.85 | 0.45 | 0.49 | 0.56  | 0.59  |
|                                 |              | 0.82                       | 0.86 | 0.43 | 0.53 | 0.55  | 0.60  |
|                                 |              | 0.80                       | 0.85 | 0.47 | 0.50 | 0.57  | 0.65  |
|                                 |              | 0.84                       | 0.86 | 0.44 | 0.52 | 0.59  | 0.61  |
| Extract I                       | 100 mg/kg    | 1.06                       | 1.17 | 1.07 | 1.10 | 1.07  | 1.06  |
|                                 |              | 1.05                       | 1.19 | 1.01 | 1.12 | 1.09  | 1.10  |
|                                 |              | 1.07                       | 1.20 | 1.05 | 1.09 | 1.05  | 1.09  |
|                                 |              | 1.03                       | 1.16 | 1.03 | 1.13 | 1.10  | 1.07  |
|                                 |              | 1.05                       | 1.18 | 1.04 | 1.11 | 1.08  | 1.06  |
| Extract II                      | 250 mg/kg    | 1.01                       | 1.10 | 0.92 | 0.99 | 0.98  | 0.93  |
|                                 |              | 1.02                       | 1.11 | 0.94 | 0.96 | 0.95  | 0.97  |
|                                 |              | 1.00                       | 1.12 | 0.89 | 1.00 | 0.99  | 0.99  |
|                                 |              | 1.03                       | 1.13 | 0.93 | 0.97 | 0.95  | 0.94  |
|                                 |              | 1.02                       | 1.09 | 0.91 | 0.98 | 0.97  | 0.96  |
| Extract II                      | 500 mg/kg    | 0.96                       | 1.08 | 0.80 | 0.84 | 0.79  | 0.83  |
|                                 |              | 0.97                       | 1.10 | 0.79 | 0.86 | 0.83  | 0.84  |
|                                 |              | 0.95                       | 1.07 | 0.81 | 0.82 | 0.86  | 0.81  |
|                                 |              | 0.99                       | 1.07 | 0.82 | 0.87 | 0.84  | 0.82  |
|                                 |              | 0.98                       | 1.06 | 0.81 | 0.81 | 0.82  | 0.79  |
